# Supplementary material
Source: publisher figshare collection journal article supplement (https://acs.figshare.com/ndownloader/files/4184494)
Supplement: Supplementary file 1 [file 4184494]

**Poly(ethylene oxide) Grafted with Short Polyethylenimine Gives DNA Polyplexes with Superior Colloidal Stability, Low Cytotoxicity and Potent *In Vitro* Gene Transfection Under Serum Conditions**

Meng Zheng,<sup>†</sup> Zhihong Zhong,<sup>‡</sup> Lei Zhou,<sup>†</sup> Fenghua Meng,<sup>†</sup> Rui Peng,<sup>§</sup>  
and Zhiyuan Zhong\*,<sup>†</sup>

<sup>†</sup> Biomedical Polymers Laboratory, and Jiangsu Key Laboratory of Advanced Functional Polymer Design and Application, Department of Polymer Science and Engineering, College of Chemistry, Chemical Engineering and Materials Science, Soochow University, Suzhou, 215123, P. R. China.

<sup>‡</sup> Lanzhou Military Command Center for Disease Control and Prevention, Lanzhou, 730020, P. R. China

<sup>§</sup> Jiangsu Key Laboratory for Carbon-Based Functional Materials & Devices, Institute of Functional Nano & Soft Materials (FUNSOM), Soochow University, Suzhou, 215123, P. R. China

\* Corresponding Author. Tel/Fax: +86-512-65880098, Email: [zyzhong@suda.edu.cn](mailto:zyzhong@suda.edu.cn)

**Table S1.** Synthesis of functional PEO containing multiple pendant allyl groups (PEO-*g*-allyl) by anionic ring opening copolymerization of EO and AGE.

| entry | polymer <sup>a</sup>        | $M_n$ (kg/mol) |                    |                  | PDI <sup>b</sup> | $f_{AGE}$ <sup>c</sup> | $F_{AGE}$ <sup>d</sup> | $N_{allyl}$ <sup>e</sup> |
|-------|-----------------------------|----------------|--------------------|------------------|------------------|------------------------|------------------------|--------------------------|
|       |                             | design         | <sup>1</sup> H NMR | GPC <sup>b</sup> |                  | (%)                    | (%)                    |                          |
| 1     | PEO(13k)- <i>g</i> -14allyl | 20.0           | 13.3               | 11.2             | 1.15             | 6.0                    | 5.0                    | 14                       |
| 2     | PEO(24k)- <i>g</i> -12allyl | 35.0           | 24.0               | 19.5             | 1.20             | 3.0                    | 2.3                    | 12                       |
| 3     | PEO(13k)- <i>g</i> -28allyl | 20.0           | 13.0               | 9.5              | 1.18             | 15.0                   | 11.2                   | 28                       |

<sup>a</sup> PEO(*x*)-*g*-*y*PEI wherein *x* represents molecular weight of PEO and *y* the number of allyl in every PEO chain. <sup>b</sup> Determined by GPC measurements (eluent: THF, flow rate: 0.6 mL/min, PEO standards).

<sup>c</sup> Mole percent of AGE in the feed. <sup>d</sup> Mole percent of AGE in the copolymer determined by <sup>1</sup>H NMR. <sup>e</sup> Number of allyl group per polymer chain determined by <sup>1</sup>H NMR.

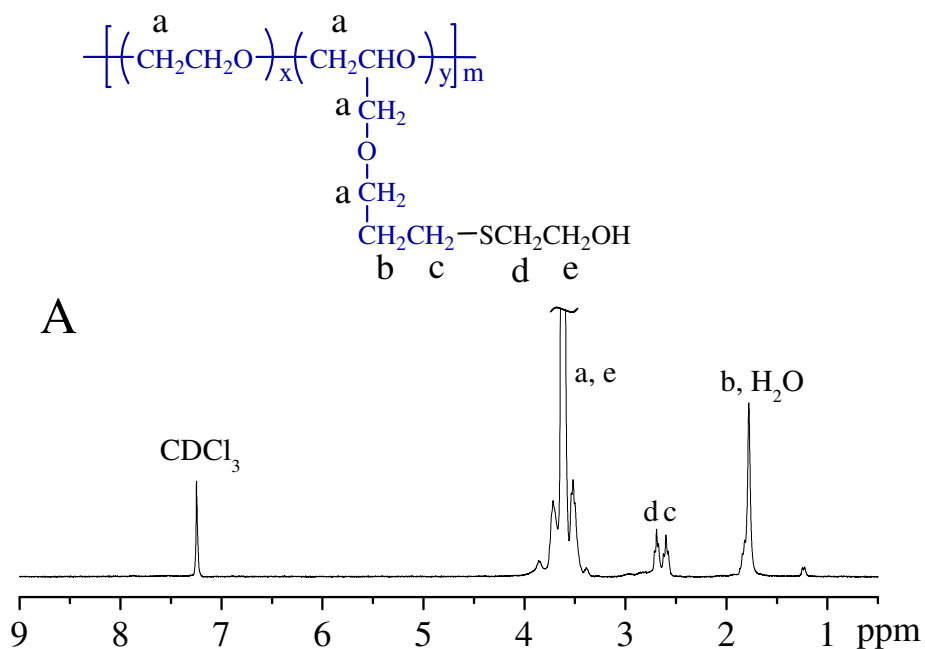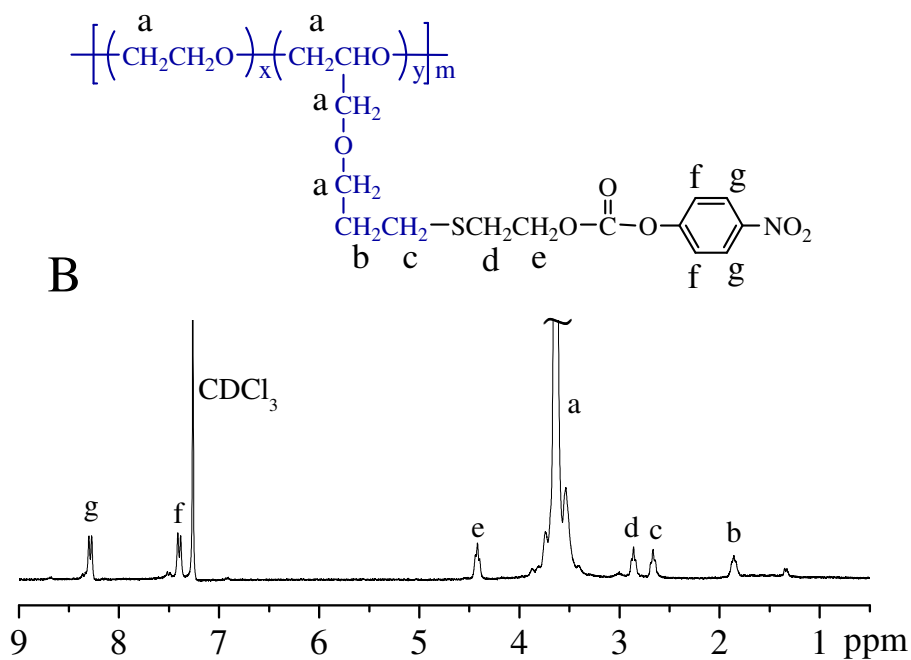

**Figure S1.** <sup>1</sup>H NMR spectra (400 MHz, CDCl<sub>3</sub>) of (A) PEO(13k)-g-OH and (B) PEO(13k)-g-NC.

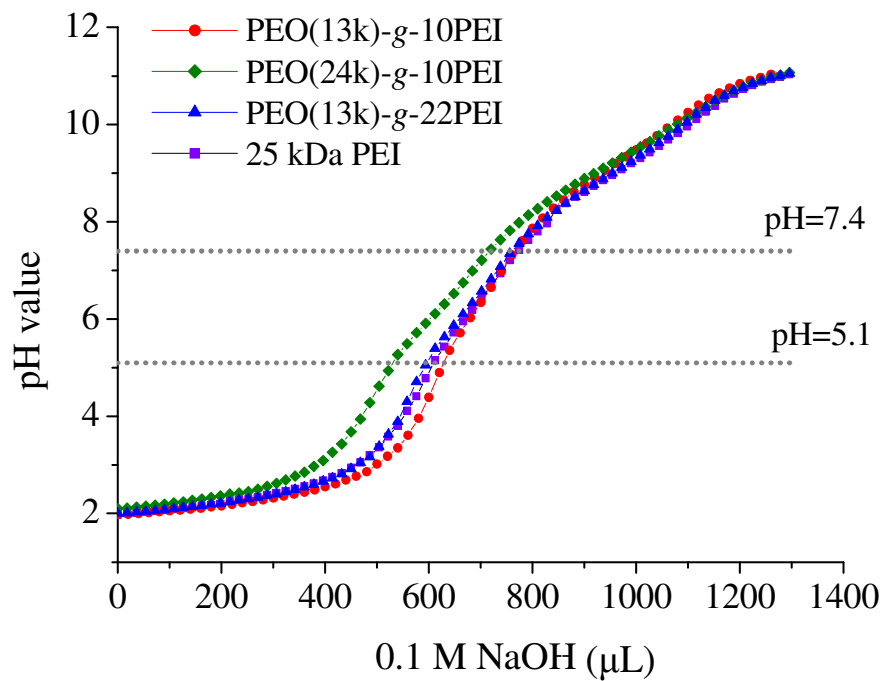

**Figure S2.** Acid-base titration curves of PEO-g-PEI in 150 mM aqueous NaCl (from pH 2 to ca. pH 11 with 0.1M NaOH). For comparison, the titration curve of 25 kDa PEI is also presented.

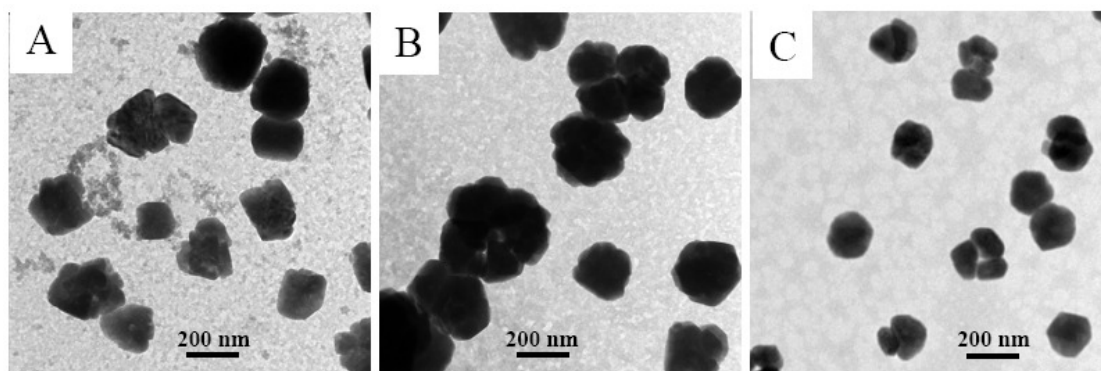

**Figure S3.** TEM images of PEO-g-PEI polyplexes at an N/P ratio of 20/1. (A) PEO(13k)-g-10PEI; (B) PEO(24k)-g-10PEI; (C) PEO(13k)-g-22PEI.
